1 **Socioeconomic Differentials in Hypertension based on JNC7 and ACC/AHA 2017**  
2 **Guidelines Mediated by Body Mass Index: Evidence from Nepal Demographic and**  
3 **Health Survey**

4

5 Juwel Rana<sup>1, 2\*</sup>; Zobayer Ahmmad<sup>3</sup>; Kanchan Kumar Sen<sup>4</sup>; Sanjeev Bista<sup>5</sup>; and Rakibul M  
6 Islam<sup>6</sup>

7

8 <sup>1</sup>Research and Innovation Division, South Asia Institute for Social Transformation (SAIST),  
9 Dhaka, Bangladesh.

10 <sup>2</sup> Department of Biostatistics and Epidemiology, University of Massachusetts Amherst,  
11 Massachusetts, USA.

12 <sup>3</sup>Department of Sociology, University of Utah, Salt Lake City, Utah, USA.

13 <sup>4</sup>Department of Statistics, University of Dhaka, Dhaka, Bangladesh.

14 <sup>5</sup>Advanced Biostatistics and Epidemiology, Ecole des Hautes Etudes en Sante Publique,  
15 Rennes, France.

16 <sup>6</sup>Department of Epidemiology and Preventive Medicine, Monash University, Melbourne,  
17 Australia.

18

19 \*Corresponding author

20 Email: [juwelranasoc@gmail.com](mailto:juwelranasoc@gmail.com); [founder@saist.ac.bd](mailto:founder@saist.ac.bd) (JR)

21

22

23

24

25

26 **Abstract**

27 **Background:** Unlike developed countries; higher socioeconomic status (SES, education, and  
28 wealth) is associated with hypertension in low and middle-income countries (LMICs) with  
29 limited evidence. We examined the associations between SES and hypertension in Nepal and  
30 the extent to which these associations vary by sex and urbanity. The body mass index (BMI)  
31 was examined as a secondary outcome and assessed as a potential mediator.

32 **Materials and methods:** We analyzed the latest Nepal Demographic and Health Survey data  
33 (N=13,436) collected between June 2016 and January 2017, using a multistage stratified  
34 sampling technique. Participants aged 15 years or older from selected households were  
35 interviewed with an overall response rate of 97%. Main outcomes were hypertension and  
36 normal blood pressure defined by the widely used Seventh Report of the Joint National  
37 Committee (JNC 7), and the American College of Cardiology/American Heart Association  
38 (ACC/AHA) 2017.

39 **Results:** The prevalence of hypertension was higher in Nepalese men than women. The  
40 likelihood of having hypertension was more than double for individuals in the highest versus  
41 lowest wealth quintiles [men: OR 2.13, 95% CI 1.60-2.85); women: OR 2.54, 95% CI 2.00-  
42 3.24] and for individuals with the higher education versus no education [men: OR 2.38, 95%  
43 CI 1.75-3.23; women: OR 1.63, 95% CI 1.18-2.25]. The associations between SES and  
44 hypertension were different by sex and urbanity. These associations were mediated by BMI.

45 **Conclusions:** Higher SES was positively associated with the higher likelihood of having  
46 hypertension in Nepal according to both JNC 7 and ACC/AHA 2017 guidelines. These  
47 associations were mediated by BMI, which may help to explain broader socioeconomic  
48 differentials in CVD and related risk factors, particularly in terms of education and wealth. Our  
49 study suggests that the mediating factor of BMI should be tackled to diminish the risk of CVD  
50 in people with higher SES in LMICs.

51

52 **Keywords:** Blood Pressure, Hypertension, Cardiovascular Diseases, Socioeconomic Status,

53 Body Mass Index, Mediation, Nepal

54

## 55 **Introduction**

56

57 Hypertension is a growing public health problem in low and middle-income countries  
58 (LMICs)<sup>1</sup> with concurrent risks of cardiovascular and kidney diseases.<sup>2</sup> A review warned that  
59 although about three-quarters of people with hypertension (639 million people) live in LMICs,  
60 there is no improvement in awareness or control rates.<sup>1</sup> Hypertension is a major contributor to  
61 death and disability in South Asian countries, including Nepal with a low level of control and  
62 awareness.<sup>3-6</sup> The World Health Organization (WHO) implemented 'STEP-wise approach to  
63 surveillance' (STEPS) using nationally representative sample in 2008 and 2013 reported an  
64 increasing trend of prevalence of hypertension among 15-69 years Nepalese population ranging  
65 from 21.5% in 2008 to 26.0% in 2013.<sup>7,8</sup> Based on the recent Nepal Demographic and Health  
66 Survey (NDHS) 2016, Kibria and colleagues reported that the estimated prevalence of  
67 hypertension in Nepal using the widely used Seventh Report of the Joint National Committee  
68 (JNC 7) guideline<sup>9</sup> was 21.2%, and the corresponding prevalence was 44.2% when using a  
69 new hypertension guideline recommended by the American College of Cardiology/American  
70 Heart Association 2017 (ACC/AHA 2017).<sup>10</sup> This study demonstrated that the prevalence of  
71 hypertension increased to 23% when using new ACC/AHA guideline, with the highest increase  
72 in the richest and obese population.<sup>11</sup>

73

74 Despite an increasing prevalence of hypertension in Nepal, research exploring complex  
75 interrelationship between socioeconomic status (SES), indicated by education levels and  
76 wealth quintiles, and hypertension is limited. Moreover, this association is complex, unlike  
77 developed countries, in LMICs. For instance, the prevalence of hypertension is higher among  
78 low SES group in developed countries,<sup>12,13</sup> while it is substantially higher among high SES  
79 groups in LMICs.<sup>14,15</sup>

80 The reasons for the high prevalence of hypertension in the low SES group in developed  
81 countries include higher smoking rates, higher body mass index (BMI), and lack of exercise  
82 compared with higher SES groups.<sup>16</sup> The opposite pattern is observed in LMICs, where a  
83 higher prevalence of these risk factors is observed in higher SES groups compared with low  
84 SES group. A recent review found that people in higher SES groups in LMICs were less likely  
85 to be physically active and consume more fats, salt, and processed food than low SES group.<sup>17</sup>  
86 Furthermore, studies also found that BMI is exponentially increasing in people in LMICs,<sup>18-20</sup>  
87 which are the key modifiable risk factors for hypertension. Thus, we hypothesized that there  
88 would be positive associations between high SES and hypertension in Nepal, and the level of  
89 BMI will at least partially mediate these associations. The primary aim of this study was (i) to  
90 assess the associations between SES and hypertension in Nepal, and the extent to which these  
91 associations vary by gender and urbanity; and (ii) to examine whether BMI attenuates the  
92 associations between SES and hypertension and, the extent to which BMI explain these  
93 associations. The secondary aim of this study was to examine associations of BMI with SES  
94 and the extent to which these associations vary by gender and urbanity.

95

## 96 **Materials and Methods**

### 97 **Data source**

98

99 The study analyzed the nationally representative Nepal Demographic and Health Survey  
100 (NDHS) 2016 data, collected between June 2016 and January 2017. The Nepal Health Research  
101 Council and the ICF International institutional review board approved the NDHS 2016 survey  
102 protocol. The household head provided written informed consent before the interview. For the  
103 current study, we obtained approval to use the data from ICF in June 2018.

104

## 105 **Survey design and study populations**

106

107 The updated version of the census frame of National Population and Housing Census 2011  
108 conducted by the Central Bureau of Statistics was used as the sampling frame for the NDHS  
109 2016. The households of the NDHS 2016 were selected in two ways based on the urban/rural  
110 locations. Firstly, the two-stage stratified sampling process was used in rural areas where wards  
111 were selected in the first stage as a primary sampling unit (PSUs) and households were selected  
112 in the second stage. Secondly, three-stage stratified sampling was used in urban areas to select  
113 households where wards were selected in the first stage (PSUs), enumeration areas (EA) were  
114 selected from each PSU in the second stage and households were selected from EAs in the third  
115 stage. There were 14 sampling strata in the NDHS 2016, where wards were selected randomly  
116 from each stratum. A total of 383 wards were selected altogether, 184 from urban and 199 from  
117 rural areas. Finally, a total of 11,490 households (rural- 5,970 and urban-5,520) were selected  
118 for the NDHS 2016.<sup>21</sup> Flowchart of the analytic sample selection process is given as  
119 supplementary figure (S1 Fig.).

120

121 The trained interviewers collected data visiting the households. The overall response rate was  
122 approximately 97%. Blood pressure (BP) was measured among 15,163 individuals with 6,394  
123 men and 8,769 women aged 15 years and above. In our study, a total unweighted sample was  
124 13,371 comprising men (5,535) and women (7,836), after excluding participants aged <18  
125 years and discarding the missing and extreme values. The total weighted analytic sample was  
126 13,436 participants (men 5,646 and women 7,790) aged 18 years and above. Details of the  
127 NDHS 2016, including survey design, sample size determination, and questionnaires have been  
128 described elsewhere.<sup>21</sup>

129

130 **Measures of outcomes: Blood Pressure Outcomes**

131

132 Hypertension and normal blood pressure were considered as the outcome variables in the study  
 133 defined by both JNC 7<sup>9</sup> and ACC/AHA 2017 guidelines (Table 1).<sup>10</sup> Three measurements of  
 134 blood pressure (systolic and diastolic blood pressures) were taken for each participant with an  
 135 interval of 5 minutes between the measurements by UA-767F/FAC (A&D Medical) blood  
 136 pressure monitor. Systolic blood pressure (SBP) and diastolic blood pressure (DBP) were  
 137 defined by taking the average of three SBP and three DBP measurements, respectively. We  
 138 used both ‘measurement-only’ and ‘medical/clinical’ definitions to generate independent  
 139 binary outcomes for ‘hypertension’ and ‘normal blood pressure’ based on both guidelines. The  
 140 ‘measurement-only’ definition was developed solely based on the cut-off points that accounted  
 141 for the average of three SBP and three DBP measurements. The ‘medical/clinical’ definition  
 142 accounted for ‘measurement-only’ definition plus medical diagnosis by a health professional  
 143 as having high blood pressure and or taking medication for lowering high blood pressure (Table  
 144 1).

145 **Table 1. Definitions of Blood Pressure Outcome Used in the Study**

| Blood pressure outcomes                  | Measurement-only definitions             | Medical definitions                                                                                                                                                                         |
|------------------------------------------|------------------------------------------|---------------------------------------------------------------------------------------------------------------------------------------------------------------------------------------------|
| Hypertension (JNC 7) <sup>†</sup>        | SBP $\geq$ 140mmHg or DBP $\geq$ 90 mmHg | Meet any of the following three criteria:<br>(1) SBP $\geq$ 140mmHg or DBP $\geq$ 90mmHg<br>(2) Doctor/nurse diagnosed high blood pressure<br>(3) Taking blood pressure-lowering medication |
| Hypertension (ACC/AHA 2017) <sup>‡</sup> | SBP $\geq$ 130mmHg or DBP $\geq$ 80 mmHg | Meet any of the following three criteria:<br>(1) SBP $\geq$ 130mmHg or DBP $\geq$ 80mmHg<br>(2) Doctor/nurse diagnosed high blood pressure<br>(3) Taking blood pressure-lowering medication |

|                                               |                               |                                                                                                                         |
|-----------------------------------------------|-------------------------------|-------------------------------------------------------------------------------------------------------------------------|
| Normal blood pressure (JNC 7 or ACC/AHA 2017) | SBP <120mmHg and DBP <80 mmHg | SBP ≤ 120mmHg and DBP ≤ 80 mmHg, no diagnosis of high blood pressure, and not taking blood pressure-lowering medication |
|-----------------------------------------------|-------------------------------|-------------------------------------------------------------------------------------------------------------------------|

146 †JNC 7= The Seventh Report of the Joint National Committee

147 ‡ACC/AHA 2017= The 2017 American College of Cardiology/American Heart Association

148

### 149 **Measures of Exposure: Socioeconomic status**

150

151 Three indicators such as education levels, wealth quintiles, and employment status are most  
152 commonly used in several studies to assess the SES of a participant.<sup>12, 15</sup> However, we omitted  
153 employment status from our assessment of SES and subsequent analyses due to a large number  
154 of missing values as the majority of the women in South Asia are not involved in formal  
155 employment. The NDHS 2016 provided data for a derived wealth quintile using the principal  
156 component analysis taking scores of a household's durable and nondurable assets. Firstly,  
157 households are given scores using principal component analysis based on the number and kinds  
158 of consumer goods they own. Secondly, to get the wealth quintiles, the distribution of scores  
159 was divided into five equal categories named as poorest, poorer, middle, richer, and richest.  
160 Education was an ordinal measure of self-reported levels of education, which was grouped into  
161 four different categories (no education/preschool, primary, secondary, and higher education)  
162 in the NDHS 2016. In our study, the SES measures were not indexed for two main reasons.  
163 Firstly, different indicators of SES tend to have different theoretical pathways to BMI and  
164 blood pressure outcomes. Secondly, SES indicators might be causally related to each other;  
165 and they build on each other according to the life course models.<sup>22</sup>

166

167



168 **Body Mass Index**

169

170 The BMI was used in the study as both continuous and categorical variables. We followed both  
171 the South-Asian specific and global definition of BMI.

172 **Statistical analysis**

173

174 Our primary statistical analyses assessed the sex and urbanity stratified associations of  
175 educational levels and wealth quintiles with blood pressure outcomes using both the  
176 measurement-only and medical definitions (Table 1; Fig 1-2; S1-4 Tables; S2-4 Fig.). To  
177 characterize the shapes of the associations, we calculated sex and urbanity stratified adjusted  
178 odds ratios (ORs) and 95% confidence intervals (CIs) within each level of education or wealth  
179 quintiles by using the binary logistic regression models. We used a cutoff of 10% change in  
180 the stratified analysis to identify differences in hypertension by sex and urbanity.

181 We further tested whether BMI mediates the associations between SES and blood pressure  
182 outcomes (medical). There were two general approaches to testing mediation models. The first  
183 approach was the “reduction-in-estimate criterion” approach (Table 4; S7 Table), which  
184 assessed whether the inclusion of mediator variable-BMI attenuated the associations or effects  
185 for the main predictors across nested models. Hence, we constructed two nested models, and  
186 coefficients were progressively adjusted for age, sex, marital status, urbanity, and second-hand  
187 smoking in model 1. Coefficients were further adjusted for prior determined mediator-BMI in  
188 model 2 to observe the changes in the effects of predictors. We considered that there is a  
189 mediation effect of BMI using a cutoff of 10% reduction in the effect estimate after adjusting  
190 for BMI in the model 2. The second step was the “indirect effect” approach, which formally  
191 examined the statistical significance of an indirect effect using the product of coefficients  
192 approach. For assessing the indirect effect of BMI on these binary outcomes, we used the  
193 binary-mediation package in Stata because this approach is commonly used and can detect

194 which variables are continuous and which are binary. It requires information for each link in  
195 the proposed mediation process (X-M-Y). In supplemental analyses, we replicated the process  
196 for 15 000 bootstraps for statistical significance, which provided substantially identical indirect  
197 and direct effects along with standard errors and biased-corrected 95% CIs.

198 Additionally, we examined the adjusted associations between SES and BMI as a continuous  
199 outcome. Moreover, the adjusted sex and urbanity stratified associations between SES and  
200 binary outcome-overweight/obese (using both global and South Asia-specific cut-offs for BMI)  
201 were also assessed to observe differences in overweight/obesity by sex and urbanity.

202 To examine the associations between SES and hypertension, all potential confounders for each  
203 predictor were selected using prior knowledge and directed acyclic graphs (DAGs) to avoid the  
204 ‘Table 2 fallacy’ in a multivariable model and to observe unbiased total effect estimates for  
205 predictors.<sup>23, 24</sup>

206 For the brevity, we have reported ‘medical definition’ of hypertension/normal blood pressure,  
207 if not stated otherwise, especially when we assessed associations between hypertension/normal  
208 blood pressure and SES. However, similar analyses for ‘measurement only’ outcome of  
209 hypertension have been provided as supplementary data. Comparable analyses based on the  
210 new guideline of ACC/AHA 2017 have also been given as supplementary data. Two-sided *P*-  
211 values and 95% CIs are presented. The complex survey design effects were accounted in all  
212 performed analyses for reducing differences due to oversampling, variation in the probability  
213 of selection and non-response in the NDHS 2016. All analyses were performed using Stata 15  
214 (StataCorp).

215

216

217

218 **Results**

**Table 2: Sample characteristics (weighted numbers and percentages unless stated otherwise)**

| <b>Characteristics</b>               | <b>Overall<br/>(n=13 436)</b> | <b>Men<br/>(n = 5645)</b> | <b>Women<br/>(n= 7790)</b> | <b>p-value</b> |
|--------------------------------------|-------------------------------|---------------------------|----------------------------|----------------|
| <b>Mean Age (SE, standard error)</b> | 40.7 (0.1)                    | 42.59 (0.28)              | 39.30 (0.19)               | < 0.001        |
| <b>Marital Status (%)</b>            |                               |                           |                            |                |
| Unmarried                            | 1569 (11.7)                   | 872 (15.4)                | 698 (9.0)                  | < 0.001        |
| Married                              | 11 867 (88.3)                 | 4 774 (84.6)              | 7092 (91.0)                |                |
| <b>Education Levels (%)</b>          |                               |                           |                            |                |
| No education/preschool               | 5498 (40.9)                   | 1474 (26.1)               | 4024 (51.7)                | < 0.001        |
| Primary                              | 2281 (17.0)                   | 1194 (21.2)               | 1087 (14.0)                |                |
| Secondary                            | 3709 (27.6)                   | 1958 (34.7)               | 1751 (22.5)                |                |
| Higher                               | 1947 (14.5)                   | 1020 (18.1)               | 928 (11.9)                 |                |
| <b>Employment Status (%)</b>         |                               |                           |                            |                |
| Unemployed                           | 2777 (30.6)                   | 557 (15.9)                | 2,220 (40.0)               | < 0.001        |
| Employed                             | 6287 (69.4)                   | 2956 (84.15)              | 3331 (60.0)                |                |
| <b>Wealth Index (%)</b>              |                               |                           |                            |                |
| Poorest                              | 2405 (17.9)                   | 993 (17.6)                | 1412 (18.1)                | < 0.001        |
| Poorer                               | 2613 (19.5)                   | 1054 (18.7)               | 1559 (20.0)                |                |
| Middle                               | 2693 (20.0)                   | 1091 (19.3)               | 1603 (20.6)                |                |

219 **General characteristics of study participants**

220

221 Of 13,436 participants, 7,790 (58%) were women, and 5,645 (42%) were men, with a mean  
 222 age of 40.7 (SE ±0.10) years (Table 2). More than half (61.1%) of the population lived in urban  
 223 areas with no significant sex difference. About 40% of the population had no education, and  
 224 men were more likely to be educated than women at each level of education (p <0.001). Men  
 225 were also more likely to be wealthier than women were (p <0.0001).

|                                                 |             |               |               |         |
|-------------------------------------------------|-------------|---------------|---------------|---------|
| Richer                                          | 2936 (21.9) | 1280 (22.8)   | 1656 (21.3)   |         |
| Richest                                         | 2787 (20.8) | 1228 (21.8)   | 1559 (20.0)   |         |
| <b>Urbanity (%)</b>                             |             |               |               |         |
| Urban                                           | 8205 (61.1) | 3475 (61.6)   | 4729 (60.7)   | 0.27    |
| Rural                                           | 5231 (38.9) | 2171 (38.6)   | 3061 (39.3)   |         |
| <b>Region (%)</b>                               |             |               |               |         |
| Mountain                                        | 859 (6.4)   | 367 (6.5)     | 491 (6.3)     | 0.60    |
| Hill                                            | 5922 (44.1) | 2468 (43.7)   | 3454 (44.3)   |         |
| Terai                                           | 6655 (49.5) | 2811 (49.8)   | 3844 (49.4)   |         |
| <b>Established Risk Factors of Hypertension</b> |             |               |               |         |
| Mean Systolic Blood Pressure (SE)               | 117.7 (0.2) | 122.02 (0.43) | 114.57 (0.38) | < 0.001 |
| Mean Diastolic Blood Pressure (SE)              | 78.3 (0.1)  | 79.89 (0.32)  | 77.17 (0.26)  | < 0.001 |
| High Blood Pressure (Told by doctor, %)         | 1670 (12.4) | 763 (13.52)   | 907 (11.64)   | 0.004   |
| Medication for Blood Pressure (%)               | 578 (4.3)   | 260 (4.61)    | 318 (4.08)    | 0.25    |
| Mean Body Mass Index (SE)                       | 22.1 (0.0)  | 21.08 (0.72)  | 22.28 (0.10)  | < 0.001 |
| Exposure to Secondhand Smoking (%)              | 6308 (47.0) | 2718 (48.2)   | 3589 (46.08)  | 0.003   |
| Consumption of Caffeine (%)                     | 1058 (8.0)  | 581 (10.3)    | 477 (6.12)    | < 0.001 |

226

227

228 A similar trend was found for employment status where men were about 24% higher in  
 229 employment status than women were ( $p < 0.001$ ). Mean BMI was significantly higher among  
 230 women (22.28 vs. 21.08;  $p < 0.001$ ) compared with men. Men were more likely to be exposed  
 231 to secondhand smoking ( $p < 0.003$ ) compared with women.

### 232 **Prevalence of hypertension by sex and urbanity**

233

234 Women were having lower prevalence of hypertension compared with men for both measured  
 235 (16.0%, 95% CI: 14.8, 17.3 vs. 22.8%, 95% CI: 21.2, 24.5) and medical hypertension (21.7%,  
 236 95% CI: 20.4, 23.0 vs. 29.1%, 95% CI: 27.4, 30.8) and the differences were significant

237 statistically in both measurements ( $p < 0.001$ ) (Table 3). People living in urban areas were  
 238 having higher prevalence of hypertension compared with people living in rural areas for both  
 239 measured (19.5%, 95% CI: 18.7, 20.4 vs. 17.9%; 95% CI: 16.9, 19.0) and medical (26.2%,  
 240 95% CI: 25.2, 27.1 vs. 22.7%; 95% CI: 21.6, 23.8) hypertension and the differences were  
 241 significant statistically ( $p < 0.001$ ) only for medical hypertension. Comparable trends were  
 242 observed for both measurements in normal blood pressure ( $p < 0.001$ ). According to the new  
 243 ACC/AHA 2017 guideline, there was an overall 21% increase of prevalence of hypertension,  
 244 with the highest increase in the male population (23%). Similar trends of sex differences were  
 245 observed in both hypertensions ( $p < 0.001$ ), however urban-rural significant differences ( $p$   
 246  $> 0.05$ ) were not observed.

247

248 **Table 3: Prevalence of hypertension by sex and urbanity in Nepal**

| Classification of Blood Pressure | Overall<br>n=13 436<br>(%) [95%<br>CI] | Male<br>n = 5645<br>(%) [95%<br>CI] | Female<br>n = 7790<br>(%) [95%<br>CI] | p value | Urban<br>n=<br>8,205(%)<br>[95% CI] | Rural<br>n=<br>5,231(%)<br>[95% CI] | p value |
|----------------------------------|----------------------------------------|-------------------------------------|---------------------------------------|---------|-------------------------------------|-------------------------------------|---------|
| <b>JNC 7 Guideline</b>           |                                        |                                     |                                       |         |                                     |                                     |         |
| Hypertension (measured)          | 2538 (18.9)<br>[17.7, 20.1]            | 1289 (22.8)<br>[21.2, 24.5]         | 1249 (16.0)<br>[14.8, 17.3]           | < 0.001 | 1600 (19.5)<br>[18.7, 20.4]         | 938 (17.9)<br>[16.9, 19.0]          | 0.22    |
| Hypertension (medical)           | 3333 (24.8)<br>[23.6, 26.0]            | 1645 (29.1)<br>[27.4, 30.8]         | 1688 (21.7)<br>[20.4, 23.0]           | < 0.001 | 2147 (26.2)<br>[25.2, 27.1]         | 1186 (22.7)<br>[21.6, 23.8]         | 0.007   |
| Normal Blood Pressure (measured) | 7233 (53.8)<br>[52.1, 55.6]            | 2581 (45.7)<br>[43.5-48.0]          | 4652 (59.7)<br>[57.9, 61.5]           | < 0.001 | 4340 (52.9)<br>[51.8, 54.0]         | 2893 (55.3)<br>[54.0, 56.7]         | 0.22    |
| Normal Blood Pressure (medical)  | 6888 (51.3)<br>[49.7, 52.9]            | 2449 (43.4)<br>[41.2, 45.6]         | 4439 (57.0)<br>[55.3, 58.7]           | < 0.001 | 4113 (50.1)<br>[49.1, 51.2]         | 2775 (53.1)<br>[51.7, 54.4]         | 0.11    |

| <b>2017 ACC/AHA Guideline</b>          |                             |                             |                             |         |                             |                             |      |
|----------------------------------------|-----------------------------|-----------------------------|-----------------------------|---------|-----------------------------|-----------------------------|------|
| Hypertension<br>(measured)             | 5728 (42.6)<br>[40.9, 44.4] | 2772 (49.1)<br>[47.8, 50.4] | 2956 (38.0)<br>[36.9, 39.0] | < 0.001 | 3582 (43.7)<br>[42.6, 44.7] | 2146 (41.0)<br>[39.7, 42.4] | 0.18 |
| Hypertension<br>(medical)              | 6136 (45.7)<br>[44.1, 47.3] | 2950 (52.3)<br>[51.0, 53.6] | 3186 (40.9)<br>[39.8, 42.0] | < 0.001 | 3848 (46.9)<br>[45.8, 48.0] | 2288 (43.7)<br>[42.4, 45.1] | 0.08 |
| Normal Blood<br>Pressure<br>(measured) | 7093 (52.8)<br>[52.0, 53.6] | 2524 (44.7)<br>[43.4, 46.0] | 4569 (58.7)<br>[57.6, 59.7] | < 0.001 | 4251 (51.8)<br>[50.7, 52.9] | 2842 (54.3)<br>[53.0, 55.7] | 0.20 |
| Normal Blood<br>Pressure<br>(medical)  | 6763 (50.3)<br>[49.5, 51.2] | 2397 (42.5)<br>[41.2, 43.8] | 4365 (56.0)<br>[54.9, 57.1] | < 0.001 | 4034 (49.2)<br>[48.1, 50.3] | 2729 (52.2)<br>[50.8, 53.5] | 0.10 |

249

250 **Socioeconomic status and hypertension by sex and urbanity**

251

252 Fig 1 and 2 explained the odds of blood pressure outcomes by education and wealth quintiles.

253 The likelihood of being hypertensive (medical) was significantly higher in higher education

254 group compared with lowest or no education group for men (OR 2.38 95% CI: 1.75, 3.23) and

255 for women (OR 1.63 95% CI: 1.18, 2.25). People in the richest group were more likely to be

256 hypertensive (medical) compared with people in the poorest group for men (OR 2.13 95% CI:

257 1.60, 2.85) and for women (OR 2.54 95% CI: 2.00, 3.24). Furthermore, the associations

258 between SES and hypertension were significant and were different by sex and urbanity (S1-4

259 Tables). Similar trends and associations between hypertension and SES were observed by

260 ACC/AHA 2017 guidelines (S2-4 Fig). Similarly, people with higher SES were less likely to

261 have normal blood pressure compared with people in low SES (S1-4 Tables).

262 **Fig 1:** Association of blood pressure outcome (medical) with education levels by sex in Nepal  
263 (In a table format as supplementary data, S1 Table)

264 **Fig 1 legends:** Odds ratios are adjusted for age, urbanity and marital status, and stratified by  
265 sex. Medical outcomes are defined based on cut-off points, diagnosis by a health professional,  
266 or relevant medication use. Cut-off points are defined as follows: hypertension: SBP  
267  $\geq 140$ mmHg or DBP  $\geq 90$ mmHg; normal blood pressure: SBP  $\leq 120$ mmHg and DBP  $\leq 80$   
268 mmHg. Measurement-only outcomes are defined based on cut-off points only and the  
269 association of blood pressure outcome (measured) with education levels by sex in Nepal.

270 **Fig 2:** Association of blood pressure outcome (medical) with wealth quintiles by sex in Nepal  
271 (In a table format as supplementary data, S2 Table).

272  
273 **Fig 2 legends:** Odds ratios are adjusted for age, urbanity and marital status, and stratified by  
274 sex. Medical outcomes are defined based on cut-off points, diagnosis by a health professional,  
275 or relevant medication use. Cut-off points are defined as follows: hypertension: SBP  
276  $\geq 140$ mmHg or DBP  $\geq 90$ mmHg; normal blood pressure: SBP  $\leq 120$ mmHg and DBP  $\leq 80$   
277 mmHg. Measurement-only outcomes are defined based on cut-off points only and the  
278 association of blood pressure outcome (measured) with wealth quintiles by sex in Nepal.

## 279 **Mediation effect of BMI on SES and hypertension**

280  
281 Tables 4 shows a reduction in estimates of SES after including BMI in the logistic regression  
282 model. For the level of education, the adjusted odds of hypertension (medical) significantly  
283 decreased throughout the models, and particularly BMI attenuated the association and level of  
284 significance for each primary, secondary and higher education category with hypertension  
285 (medical) in the model 2 (Table 4: Model 1 vs. Model 2).

286 **Table 4: Mediation effect of BMI on hypertension (medical) by education levels and**  
 287 **wealth quintiles in Nepal**

| Predictor                                      | Model 1 <sup>§</sup>                    | Model 2 <sup>  </sup>                   |
|------------------------------------------------|-----------------------------------------|-----------------------------------------|
|                                                | Adjusted Beta coefficients<br>(95 % CI) | Adjusted Beta coefficients<br>(95 % CI) |
| <b>Education (Ref. No education/preschool)</b> |                                         |                                         |
| Primary                                        | 0.40 (0.22, 0.58)***                    | 0.24 (0.06, 0.42)*                      |
| Secondary                                      | 0.58 (0.42, 0.75)***                    | 0.35 (0.17, 0.53)***                    |
| Higher                                         | 0.61 (0.38, 0.85)***                    | 0.32 (0.06, 0.57)*                      |
| <b>Wealth Quintiles (Ref. Poorest)</b>         |                                         |                                         |
| Poorer                                         | 0.25 (0.08, 0.42)**                     | 0.21 (0.04, 0.38)*                      |
| Middle                                         | 0.13 (-0.07, 0.33)                      | 0.08 (-0.11, 0.27)                      |
| Richer                                         | 0.20 (0.01, 0.39)*                      | 0.02 (-0.18, 0.21)                      |
| Richest                                        | 0.84 (0.62, 1.05)***                    | 0.39 (0.16, 0.62)***                    |

288 <sup>§</sup>Coefficients adjusted for age, sex, marital status, urbanity, and second-hand smoking;

289 <sup>||</sup>Coefficients further adjusted for body mass index (BMI); Exponentiated coefficients; 95%  
 290 confidence intervals in brackets

291 \* p<0.05, \*\* p<0.01, \*\*\* p<0.001.

292  
 293 Table 4 also suggests that further adjustment for BMI in model 2 reduced the effect size and  
 294 level of significance in wealth quintiles and hypertension (medical). In other words, the  
 295 inclusion of BMI in the model 2 has reduced the beta coefficient of hypertension for wealth  
 296 quintiles and reduced statistical significance (Table 4: Model 1 vs. Model 2). BMI, therefore,  
 297 may have a mediation effect on the association between SES and blood pressure outcomes.  
 298 Similar analyses were also performed for normal blood pressure (medical) [S7 Table].

299 **Mediation Analysis: Body Mass Index**

300 We formally tested the mediation effect of BMI on hypertension (medical) and SES as well as  
 301 presented the unstandardized path coefficients (standard errors) and indirect effect (mediation)  
 302 of BMI with bias-corrected 95% CI (Fig 3). A statistically significant mediation effect was



303 observed for education (Coef. 0.04 95% CI: 0.03 to 0.05), which was substantially larger than  
304 the direct effect (Coef. -0.16 95% CI: -0.19 to -0.14). The proportion of the total effect that is  
305 mediated was about -0.31, which was also substantial. BMI also had mediation effect (Coef.  
306 0.07 95% CI: 0.06 to 0.08) in the association between wealth quintiles and hypertension  
307 (medical), with 91% of the total effect (of wealth quintiles on hypertension) being mediated  
308 (by BMI). It was substantially higher than the direct effect (Coef. 0.01 95% CI: -0.02 to 0.03).

309

310 **Fig 3:** Mediating Role of BMI in the Associations between SES and Hypertension (Medical)  
311 in Nepal

312 **Fig 3 legends:** Unstandardized path coefficients (standard errors) and unstandardized indirect  
313 effect (mediation) of BMI with bias-corrected 95% confidence intervals are reported.

314

### 315 **Sensitivity analyses**

316 We conducted sensitivity analyses that assessed the associations between SES and  
317 hypertension (measured and medical) adjusted for potential confounders according to the new  
318 guidelines of ACC/AHA 2017, which were stratified by sex and urbanity (S2-4 Fig). These  
319 analyses produced estimates and trends that are very similar to those for primary analyses,  
320 which reinforce our findings that increasing SES is associated with an increased likelihood of  
321 having hypertension, which differed by sex and urbanity.

322 Our sensitivity analyses constructed nested logistic regression models for the associations  
323 between blood pressure outcomes (medical) and SES that progressively adjusted for age, sex,  
324 urbanity, marital status, exposure to second-hand smoke and BMI (Table 4, S7 Table). The  
325 estimates and trends reinforce our primary findings.

326 For our secondary outcome, we examined the associations between SES and BMI using two  
327 different approaches. Firstly, we conducted sex and urbanity stratified analyses for SES and  
328 both global and South Asia specific categories of BMI (S5-7 Fig; S5 Table). We also tested  
329 BMI as a continuous variable in association with SES due to the low prevalence of obesity (S6  
330 Table). These results supported that the likelihood of being overweight/obese increased with  
331 increasing level of SES, which also differed by sex and urbanity.

332

### 333 **Discussion**

334

335 Our study, including 13 436 people from a nationally representative survey, demonstrated that  
336 increasing levels of SES (education and wealth) were positively associated with an increased  
337 risk of having hypertension in Nepal, with strong evidence that men were more likely to be  
338 hypertensive than women. These associations also vary by urbanity. Our novel finding is that  
339 BMI partially mediated the associations between SES and hypertension in the context of  
340 LMICs. We found these results were comparable for both the JNC 7 and the ACC/ AHA 2017  
341 guidelines.

342 Established evidence suggests that risk factors for CVD, including hypertension, are highly  
343 prevalent in low SES group in developed countries.<sup>12,23</sup> In contrast to this evidence, our study  
344 shows that the prevalence of hypertension was greater among people with higher SES groups,  
345 which is consistent with recent studies conducted in LMICs,<sup>24-26</sup> particularly in South Asia.<sup>15,27</sup>

346 Substantial differences between male and female were observed in the association between  
347 SES and hypertension, which is consistent with previous studies in developed countries.<sup>15,28,29</sup>

348 In line with these studies, our study observed that increasing levels of education and wealth  
349 quintiles have a positive association with higher likelihood of BMI both in men and women.

350 Hence, we formally tested the mediating roles of BMI in the association between higher SES

351 and hypertension and demonstrated that BMI attenuates the observed associations. In other  
352 words, BMI may help to explain broader SES differentials in hypertension, particularly by  
353 education and wealth quintiles. Evidence from higher income countries also supported that  
354 BMI mediates the association between education and the risk of cardiovascular diseases.<sup>32</sup>

355 Our observed results have several policy implications. The comprehensive understanding of  
356 the mechanisms of socioeconomic differentials in hypertension may help to take effective  
357 measures for the prevention of risk of CVD in resource-poor settings. Findings related to SES  
358 by sex differences in hypertension will also guide to take gender-sensitive policy measures in  
359 reducing CVD and its modifiable risk factors.

360 Moreover, the identification of BMI as a mediator of the higher SES and hypertension  
361 association, emphasize to this modifiable risk factor as a potential target for interventions to  
362 reduce CVD and related risk factors such as hypertension and elevated blood pressure in higher  
363 SES groups in LMICs. This study provides further evidence allied to the emergence of SES  
364 gradients in CVD and related risk factors. Although few recent studies found SES gradients in  
365 CVD risk in LMICs setting, this research contributes to previous work by bridging the fields  
366 of socioeconomic differentials in CVD risk and formally testing established theoretical models.  
367 The veracity of our findings is contingent on replication with longitudinal data and more  
368 comprehensive assessments of SES.

369 To the best of our knowledge, this is the first study found mediating roles of the modifiable  
370 risk factors of CVD in the SES and hypertension association using a nationally representative  
371 sample in a resource-poor setting. Our study also first time assessed the association between  
372 SES and hypertension according to standard hypertension JNC7 guideline and a new guideline  
373 recommended by the ACC/ AHA 2017. We observed sex and rural-urban differences in blood  
374 pressure outcomes by sex and urbanity stratified analysis. Furthermore, we have included

375 medication adherence and multiple SES factors, which suggest an inclusive explanation of the  
376 association between higher SES and risk factors of CVD. For instance, recent studies also  
377 emphasized to investigate SES gradient along with sex and rural-urban differences in blood  
378 pressure outcomes in Nepal.<sup>7, 8, 11, 33</sup>

379 Along with these novel contributions and methodological strengths, some limitations may also  
380 be considered with the interpretation of the results. We were not able to assess the causality of  
381 the associations between SES and hypertension due to the cross-sectional nature of the data.  
382 Our measurement of SES omits an indicator of employment status which should be assessed  
383 in detail in further research. Blood pressure measurement error may occur due to the quality of  
384 medical staff training in various regions of Nepal even though an automatic device for BP  
385 measurement had been used. Finally, we were not able to assess the gender inequalities in  
386 access to medications use due to the insufficient information.

## 387 **Conclusions**

388 In conclusion, higher SES was positively associated with the higher likelihood of having  
389 hypertension in Nepal according to both JNC7 and ACC/AHA 2017 guidelines. All of the  
390 observed trends were more pronounced in men than in women, and there was evidence of  
391 differences in these trends between residents in rural and urban areas. The association between  
392 higher SES and hypertension was mediated by BMI, which may help to explain broader  
393 socioeconomic differentials in CVD and related risk factors, particularly in terms of education  
394 and wealth. Our study suggests that the mediating factor of BMI should be tackled to diminish  
395 the risk of CVD in people with higher SES in LMICs.

396

397

398

399

400

401

402

403

404

405

406

407 **Acknowledgments**

408 The authors thank to MEASURE DHS for granting access to the Nepal Demographic and  
409 Health Survey 2016 data. We also thank Prof. Parisa Tehranifar for her critical comments and  
410 suggestions on the initial version.

411

412 **Authors' contributions**

413 JR and RI developed the study concepts. JR, KKS, and RI analyzed the data. JR, ZA, KKS,  
414 and SB drafted the manuscript. All authors critically reviewed the manuscript. All authors have  
415 read and approved the final version of the paper.

416

417 **Conflict of Interest**

418 None declared.

419

420 **Source of Funding**

421 Not supported by any funding body.

422

423 **Ethical Approval and Consent to participate**

424 The survey protocol for the primary data collection was approved by the ICF Institutional  
425 Review (IRB) and the Ministry of Health Ramshah Path, Kathmandu, Nepal. Informed consent  
426 was taken from each participant before the enrollment in the study. DHS program gave us  
427 formal approval to obtain the de-identified data from the DHS online archive after. Details:  
428 <https://dhsprogram.com/data/Using-325 DataSets-for-Analysis.cfm>

429

430

431 **References**

432

- 433 1. Ibrahim MM and Damasceno A. Hypertension in developing countries. *Lancet* 2012;  
434 380(9841): 611-619.
- 435 2. Danaei G, Lu Y, Singh GM, Carnahan E, et al. Cardiovascular disease, chronic kidney  
436 disease, and diabetes mortality burden of cardiometabolic risk factors from 1980 to 2010: A  
437 comparative risk assessment. *Lancet Diabetes Endocrinol.* 2014; 2(2): 634-647.
- 438 3. Tripathy JP, Thakur JS, Jeet G, Chawla S and Jain S. Alarming high prevalence of  
439 hypertension and pre-hypertension in North India-results from a large cross-sectional  
440 STEPS survey. *PLoS One* 2017; 12(12): e0188619.
- 441 4. Karmacharya BM, Koju RP, LoGerfo JP, Chan KC, Mokdad AH, Shrestha A,  
442 Sotoodehnia N, Fitzpatrick AL. Awareness, treatment and control of hypertension in  
443 Nepal: findings from the Dhulikhel Heart Study. *Heart Asia* 2017; 9(1): 1- 8.
- 444 5. Devkota S, Dhungana RR, Pandey AR, Bista B, Panthi S, Thakur KK, Gajurel RM.  
445 Barriers to Treatment and Control of Hypertension among Hypertensive Participants: A  
446 Community-Based Cross-sectional Mixed Method Study in Municipalities of Kathmandu,  
447 Nepal. *Front Cardiovasc Med.* 2016; 3: 26.
- 448 6. Krishnan A, Garg R and Kahandaliyanage A. Hypertension in the South-East Asia region:  
449 an overview. In: *Regional Health Forum* 2013; 7-14.
- 450 7. Aryal KK, Mehata S, Neupane S, Vaidya A, Dhimal M, Dhakal P, Rana S, Bhusal CL,  
451 Lohani GR, Paulin FH, Garg RM, Guthold R, Cowan M, Riley LM, Karki KB. The  
452 burden and determinants of non communicable diseases risk factors in Nepal: Findings  
453 from a nationwide STEPS survey. *PLoS One* 2015; **10**: 1–18.
- 454 8. Karki K, Dahal B, Regmi A, Poudel A and Gurung Y. WHO STEPS Surveillance: Non-  
455 communicable Diseases Risk Factors Survey. 2008. *Kathmandu: Ministry of Health and*  
456 *Population, GoN, Society for Local Integrated Development Nepal (SOLID Nepal) and*

- 457        *WHO* 2008.
- 458    9. Chobanian A V, Bakris GL, Black HR, et al. National Heart, Lung, and Blood Institute  
459        Joint National Committee on Prevention, Detection, Evaluation, and Treatment of High  
460        Blood Pressure, National High Blood Pressure Education Program Coordinating  
461        Committee. The Seventh Report of the Joint National Committee on Prevention,  
462        Detection, Evaluation, and Treatment of High Blood Pressure: the JNC 7 report. *JAMA*  
463        2003; 289: 2560–72.
- 464    10. Whelton PK, Carey RM, Aronow WS et al. 2017  
465        ACC/AHA/AAPA/ABC/ACPM/AGS/APhA/ASH/ASPC/NMA/PCNA Guideline for the  
466        Prevention, Detection, Evaluation, and Management of High Blood Pressure in Adults: a  
467        report of the American College of Cardiology/American Heart Association Task Force on  
468        Clinical Practice Guidelines. *J Am Coll Cardiol* 2018; 71: e127–e248.
- 469    11. Kibria GM Al, Swasey K, Kc A, Mirbolouk M, Sakib MN, Sharmeen A, Chadni MJ,  
470        Stafford KA. Estimated Change in Prevalence of Hypertension in Nepal Following  
471        Application of the 2017 ACC/AHA Guideline. *JAMA Netw Open* 2018; 1: e180606.
- 472    12. Leng B, Jin Y, Li G, Chen L and Jin N. Socioeconomic status and hypertension: a meta-  
473        analysis. *J Hypertens* 2015; 33(2): 221-229.
- 474    13. Grotto I, Huerta M and Sharabi Y. Hypertension and socioeconomic status. *Curr Opin*  
475        *Cardiol* 2008; 23(4): 335-339.
- 476    14. Kreamsoulas C, Corsi DJ and Subramanian SV. Commentary: The salience of  
477        socioeconomic status in assessing cardiovascular disease and risk in low- and middle-  
478        income countries. *Int J Epidemiol* 2015; 44(5): 1636-1647.
- 479    15. Harshfield E, Chowdhury R, Harhay MN, Bergquist H and Harhay MO. Association of  
480        hypertension and hyperglycaemia with socioeconomic contexts in resource-poor settings:  
481        the Bangladesh Demographic and Health Survey. *Int J Epidemiol* 2015;



- 482 44(5): 1625-1636.
- 483 16. He Y-H, Jiang G-X, Yang Y, Huang HE, Li R, Li XY, Ning G, Cheng Q. Obesity and its  
484 associations with hypertension and type 2 diabetes among Chinese adults age 40 years  
485 and over. *Nutrition* 2009; 25(11): 1143-1149.
- 486 17. Allen L, Williams J, Townsend N, Mikkelsen B, Roberts N, Foster C, Wickramasinghe  
487 K. Socioeconomic status and non-communicable disease behavioural risk factors in low-  
488 income and lower-middle-income countries: a systematic review. *Lancet Glob Heal*  
489 2017; 5: e277–e289.
- 490 18. Pelletier DL and Rahn M. Trends in body mass index in developing countries. *Food Nutr*  
491 *Bull* 1998; 19(3): 223-239.
- 492 19. Bhurosy T and Jeewon R. Overweight and obesity epidemic in developing countries: a  
493 problem with diet, physical activity, or socioeconomic status? *Sci World J* 2014; 2014.
- 494 20. Amugsi DA, Dimbuene ZT, Mberu B, Muthuri S and Ezeh AC. Prevalence and time  
495 trends in overweight and obesity among urban women: an analysis of demographic and  
496 health surveys data from 24 African countries, 1991–2014. *BMJ Open* 2017; 7(10):  
497 e017344.
- 498 21. Ministry of Health and Population (MoHP) NNEaIII. *Nepal Demographic and Health*  
499 *Survey (NDHS) 2016*. 2017. Kutmundu: Ministry of Health and Population.
- 500 22. Mirowsky J. *Education, social status, and health*. Routledge, 2017.
- 501 23. Textor J, van der Zander B, Gilthorpe MS, Liśkiewicz M and Ellison GT. Robust causal  
502 inference using directed acyclic graphs: the R package ‘dagitty’. *Int J Epidemiol* 2016;  
503 45(6): 1887-1894.
- 504 24. Westreich D and Greenland S. The table 2 fallacy: presenting and interpreting  
505 confounder and modifier coefficients. *Am J Epidemiol* 2013; 177(4): 292-298.
- 506 25. Cha SH, Park HS and Cho HJ. Socioeconomic disparities in prevalence, treatment, and

- 507 control of hypertension in middle-aged Koreans. *J Epidemiol* 2012; 22(5): 425-  
508 432.
- 509 26. Busingye D, Arabshahi S, Subasinghe AK, Evans RG, Riddell MA and Thrift AG. Do  
510 the socioeconomic and hypertension gradients in rural populations of low-and middle-  
511 income countries differ by geographical region? A systematic review and meta-analysis.  
512 *Int J Epidemiol* 2014; 43(5): 1563-1577.
- 513 27. Busingye D, Evans RG, Arabshahi S, Subasinghe AK, Riddell MA and Thrift AG.  
514 Rejoinder: Socioeconomic gradients and hypertension in low-and middle-income  
515 countries: a straw man and no solutions. *Int J Epidemiol* 2014; 43(5): 1581-  
516 1582.
- 517 28. Razak F and Subramanian S. Commentary: Socioeconomic status and hypertension in  
518 low- and middle-income countries: can we learn anything from existing studies? *Int J*  
519 *Epidemiol* 2014; 43(5): 1577-1581.
- 520 29. Neupane D, McLachlan CS, Sharma R, Gyawali B, Khanal V, Mishra SR, Christensen  
521 B, Kallestrup P. Prevalence of hypertension in member countries of South Asian  
522 Association for Regional Cooperation (SAARC): systematic review and meta-analysis.  
523 *Medicine* 2014; 93(13).
- 524 30. Stroope S. Seclusion, decision-making power, and gender disparities in adult health:  
525 examining hypertension in India. *Soc Sci Res* 2015; 53: 288-299.
- 526 31. Van Minh H, Byass P, Chuc NTK and Wall S. Gender differences in prevalence and  
527 socioeconomic determinants of hypertension: findings from the WHO STEPs survey in a  
528 rural community of Vietnam. *J Hum Hypertens* 2006; 20(2): 109.
- 529 32. Dégano IR, Marrugat J, Grau M, Salvador-González B, Ramos R, Zamora A, Martí R,  
530 Elosua R. The association between education and cardiovascular disease incidence is  
531 mediated by hypertension, diabetes, and body mass index. *Sci Rep* 2017; 7: 1–8.

532 33. Aryal N, Weatherall M, Bhatta YKD, Mann S. Blood pressure and hypertension in  
533 people living at high altitude in Nepal. *Hypertens Res* 2019;42(2):284-291.

534

## 535 **Supporting information**

536

### 537 **Supplementary Tables**

538 **S1 Table. Association of blood pressure outcome with education levels stratified by sex in**  
539 **Nepal.** Odds ratios are adjusted for age, urbanity and marital status; \* p<0.05, \*\* p<0.01, \*\*\*  
540 p<0.001.

541 **S2 Table. Association of blood pressure outcome with wealth quintiles stratified by sex in**  
542 **Nepal.** Odds ratios are adjusted for age, urbanity and marital status; \* p<0.05, \*\* p<0.01, \*\*\*  
543 p<0.001.

544 **S3 Table. Association of blood pressure outcome with education levels stratified by**  
545 **urbanity in Nepal.** Odds ratios are adjusted for age, sex and marital status; \* p<0.05, \*\*  
546 p<0.01, \*\*\* p<0.001.

547 **S4 Table. Association of blood pressure outcome with wealth quintiles stratified by**  
548 **urbanity in Nepal.** Odds ratios are adjusted for age, sex and marital status; \* p<0.05, \*\*  
549 p<0.01, \*\*\* p<0.001.

550 **S5 Table. Association of Overweight/Obesity (South Asia specific definition) with**  
551 **education levels and wealth quintiles by urbanity in Nepal.** Model 1: Association of  
552 Overweight-SA with Education Level (Odds are adjusted for age, marital status and urbanity;  
553 \* p<0.05, \*\* p<0.01, \*\*\* p<0.001). Model 2: Association of Overweight-SA with Wealth  
554 Quintiles (Odds are adjusted for age, marital status and urbanity; \* p<0.05, \*\* p<0.01, \*\*\*  
555 p<0.001).

556 **S6 Table. Linear Regression comparing BMI with educational levels and wealth quintiles**  
557 **in Nepal.** Model 1: Association between BMI and Education Levels (Coefficients are adjusted  
558 for age, marital status, and urbanity; \* p<0.05, \*\* p<0.01, \*\*\* p<0.001). Model 2: Association  
559 between BMI and Wealth Quintiles (Coefficients are adjusted for age, marital status and  
560 urbanity; \* p<0.05, \*\* p<0.01, \*\*\* p<0.001).

561 **S7 Table. Mediation effect of BMI on Normal Blood Pressure Outcome (medical) by**  
562 **Education Levels and Wealth Quintiles.** aCoefficients adjusted for age, sex, marital status,  
563 urbanity, and second-hand smoking; bCoefficients further adjusted for body mass index (BMI);  
564 Exponentiated coefficients; 95% confidence intervals in brackets \* p<0.05, \*\* p<0.01, \*\*\*  
565 p<0.001.

566

### 567 **Supplementary Figures**

568 **S1 Fig.** Flow chart of analytic sample selection process

569 **S2 Fig. Association of hypertension (measured and medical) by ACC/AHA 2017 guideline**  
570 **with education levels by sex in Nepal.** Odds ratios are adjusted for age, urbanity and marital  
571 status, and stratified by sex. Measurement-only outcomes are defined based on cut-off points  
572 only; medical outcomes are defined based on cut-off points, diagnosis by a health professional  
573 or relevant medication use.

574 **S3 Fig. Association of hypertension (measured and medical) by ACC/AHA 2017 guideline**  
575 **with wealth quintiles by sex in Nepal.** Odds ratios are adjusted for age, urbanity and marital  
576 status, and stratified by sex. Measurement-only outcomes are defined based on cut-off points  
577 only; medical outcomes are defined based on cut-off points, diagnosis by a health professional  
578 or relevant medication use.

579 **S4 Fig. Association of hypertension (medical) by ACC/AHA 2017 guideline with**  
580 **education and wealth quintiles by urbanity in Nepal.** Odds ratios are adjusted for age, sex,  
581 and marital status, and stratified by urbanity. Medical outcomes are defined based on cut-off  
582 points, diagnosis by a health professional, or relevant medication use.

583 **S5 Fig. Association of overweight/obese with a) education levels b) wealth quintiles by**  
584 **the sex in Nepal.** Odds ratios are adjusted for age, urbanity and marital status, and stratified  
585 by sex. Overweight and obese are defined as BMI  $\geq 23$  kg/m<sup>2</sup> (South Asia-specific  
586 definitions).

587 **S6 Fig. Association of overweight/ obese (global definition) with a) education levels b)**  
588 **wealth quintiles by the sex in Nepal.** Odds ratios are adjusted for age, urbanity and marital  
589 status and stratified by sex. Overweight and obese are defined as BMI  $\geq 25$  kg/m<sup>2</sup> (Global  
590 definitions).

591 **S7 Fig. Association of overweight/ obese (global definition) with a) education levels b)**  
592 **wealth quintiles by the urbanity in Nepal.** Odds ratios are adjusted for age, sex, and marital  
593 status and stratified by the place of residence. Overweight and obese are defined as BMI  $\geq 25$   
594 kg/m<sup>2</sup> (Global definitions).

595

596

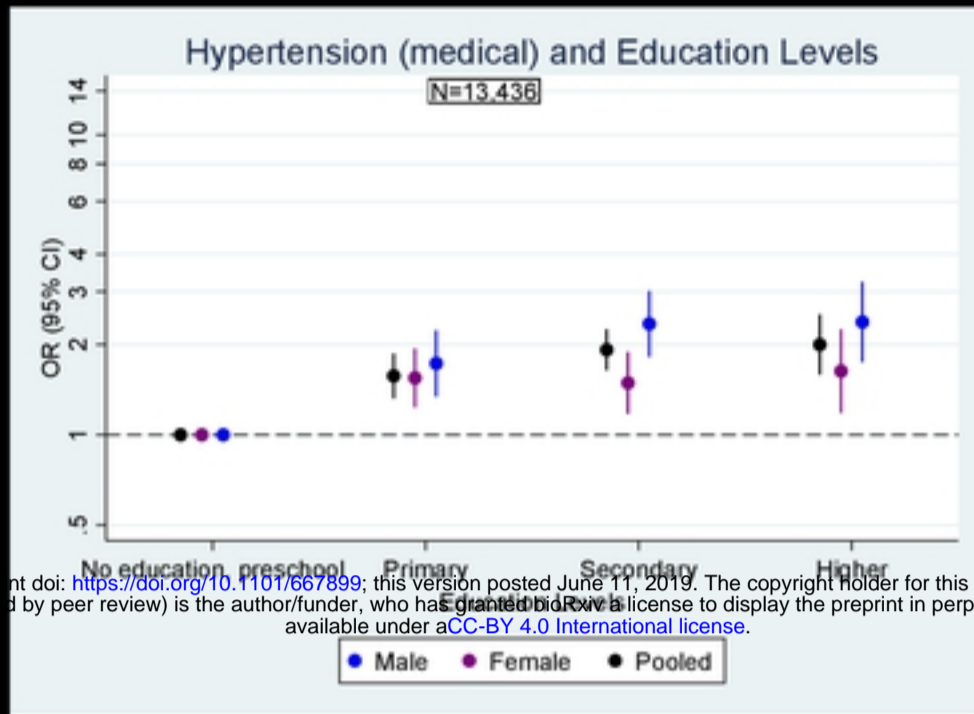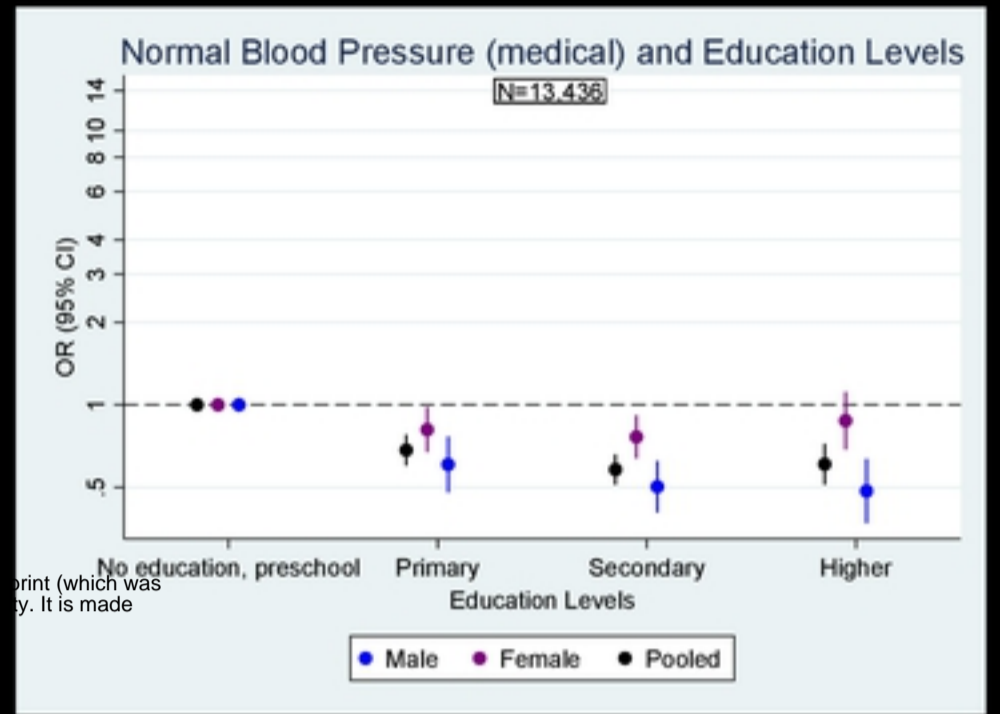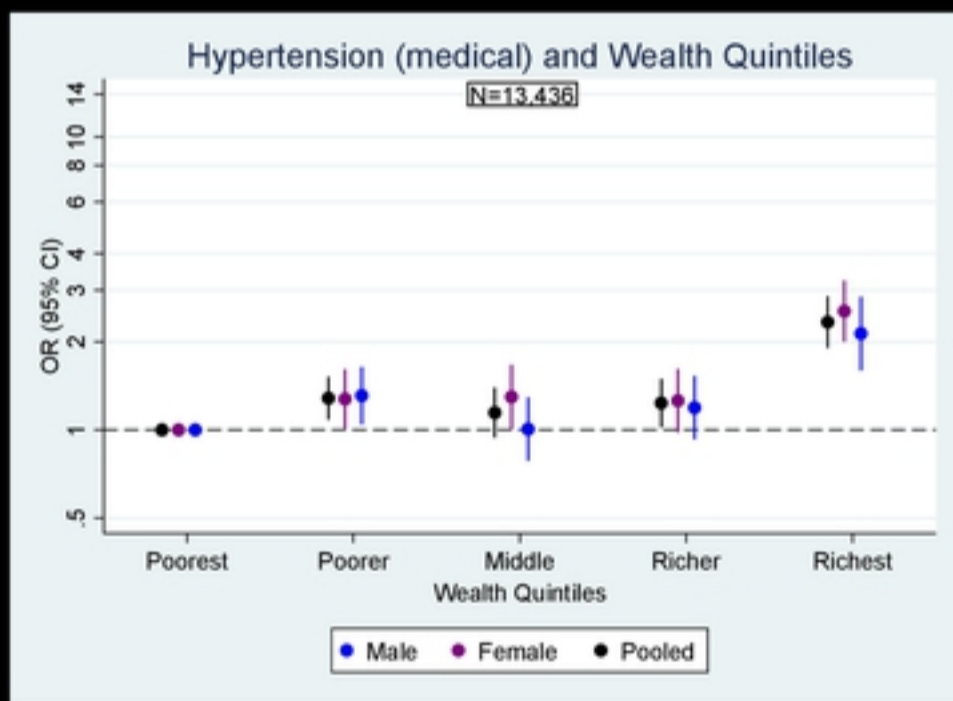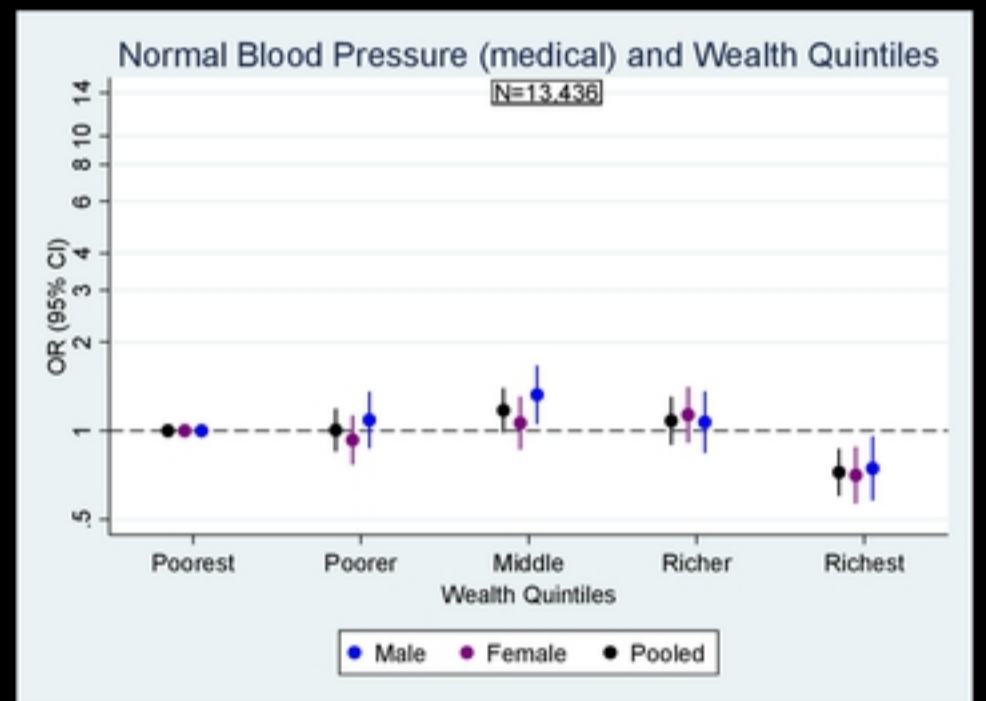

Figure
